# Supplementary material for: CB1R and iNOS are distinct players promoting pulmonary fibrosis in Hermansky–Pudlak syndrome
Source: PubMed Central journal article supplement (PMC8255071; doi:10.1002/ctm2.471), 2021-07-04

## Supporting Information

### **CB<sub>1</sub>R and iNOS are distinct players promoting pulmonary fibrosis in Hermansky-Pudlak syndrome**

Resat Cinar<sup>1\*</sup>, Joshua K. Park<sup>1</sup>, Charles N. Zawatsky<sup>1</sup>, Nathan J. Coffey<sup>1</sup>, Steven P. Bodine<sup>2</sup>, Jasmina Abdalla<sup>1</sup>, Tadafumi Yokoyama<sup>2†</sup>, Tony Jourdan<sup>1‡</sup>, Lindsey Jay<sup>1</sup>, Mei Xing G. Zuo<sup>1</sup>, Kevin J. O'Brien<sup>2</sup>, Junfeng Huang<sup>3</sup>, Ken Mackie<sup>4</sup>, Asaf Alimardanov<sup>3</sup>, Malliga R. Iyer<sup>1</sup>, William A. Gahl<sup>2,5</sup>, George Kunos<sup>1</sup>, Bernadette R. Gochuico<sup>2</sup>, May Christine V. Malicdan<sup>2,5</sup>

<sup>1</sup>Laboratory of Physiologic Studies, National Institute on Alcohol Abuse and Alcoholism, National Institutes of Health, Rockville, MD, 20852, USA.

<sup>2</sup>Section of Human Biochemical Genetics, Medical Genetics Branch, National Human Genome Research Institute, National Institutes of Health, Bethesda, MD, 20892, USA.

<sup>3</sup>Therapeutics Development Branch, Division of Preclinical Innovation, National Center for Advancing Translational Sciences, National Institutes of Health, Rockville, MD

<sup>4</sup>Department of Psychological and Brain Sciences, Indiana University, Bloomington, IN

<sup>5</sup>NIH Undiagnosed Diseases Program and Office of the Clinical Director, National Human Genome Research Institute, National Institutes of Health, Bethesda, MD 20892, USA.

\*To whom correspondence should be addressed: Resat Cinar, BPharm, PhD  
([resat.cinar@nih.gov](mailto:resat.cinar@nih.gov))

† Department of Pediatrics, Kanazawa University, Kanazawa Japan

‡ INSERM Lipids, Nutrition, Cancer UMR1231, University of Burgundy and Franche-Comté, Dijon, France

**Running Title:** Dual targeting of CB<sub>1</sub>R and iNOS in HPSPF

# Supplemental Figure 1

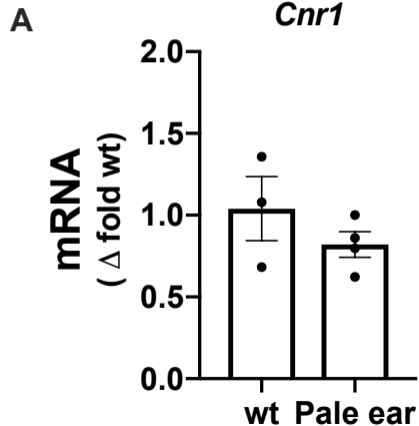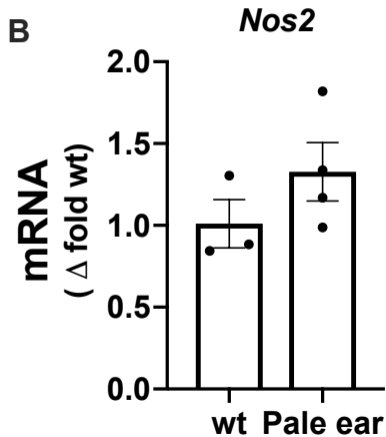

Supplemental Figure 2

**A** Negative control

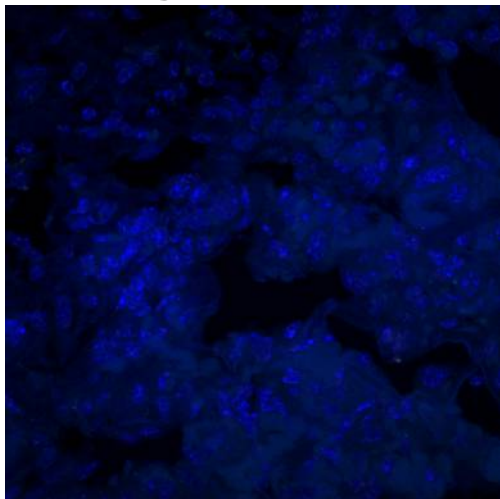

**B** Positive control

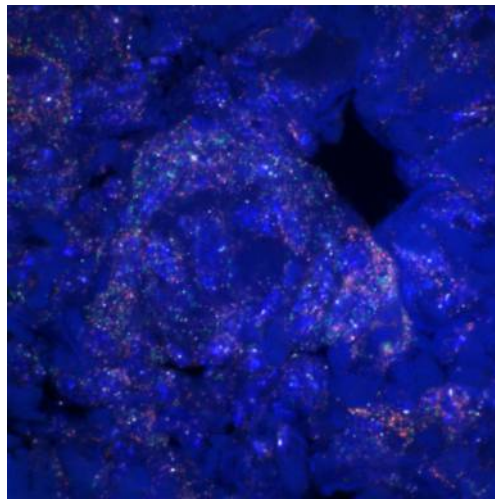

**C** *Nos2* / *Sftpc* / *Cnr1*

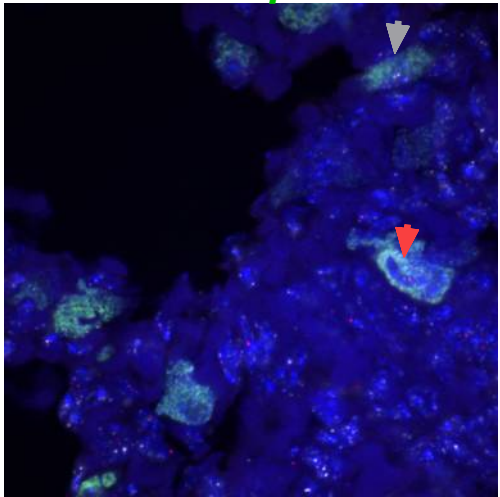

**D** *Nos2* / *CD68* / *Cnr1*

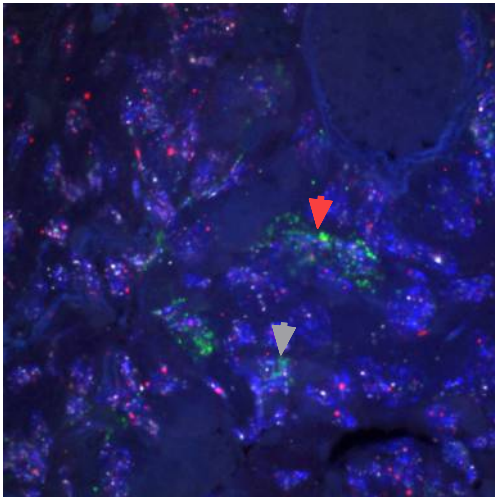

**E** *Nos2* / *Col1a* / *Cnr1*

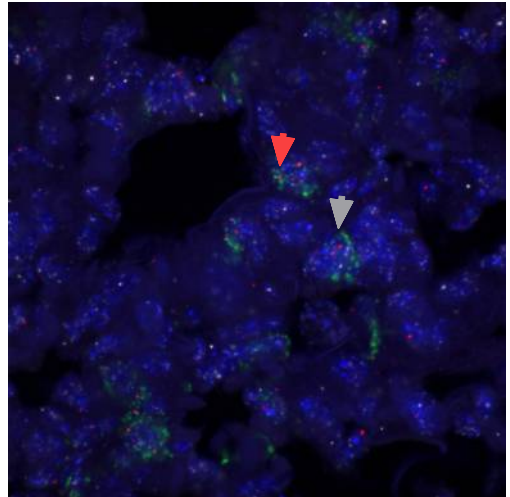

**F** *Nos2* / *Pdpn* / *Cnr1*

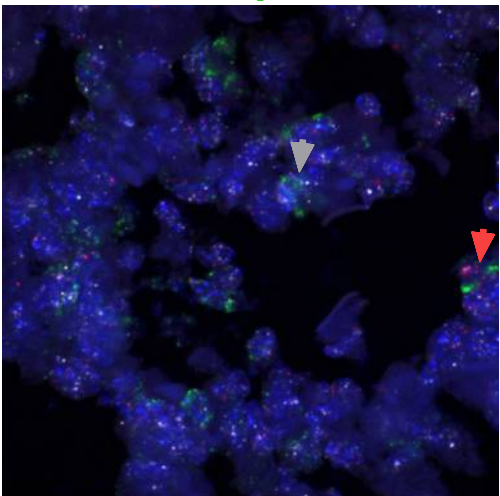

**G** *Nos2* / *Pecam* / *Cnr1*

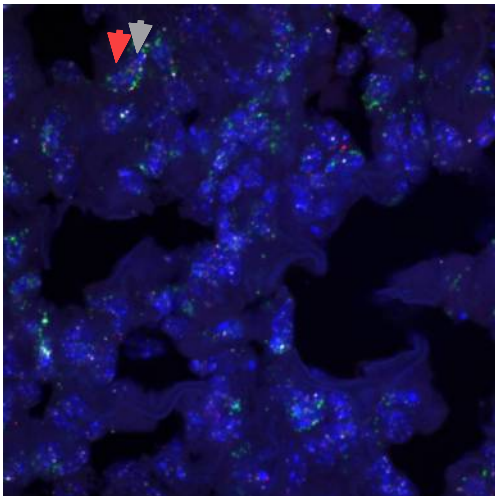

**H** *Nos2* / *Cspg4* / *Cnr1*

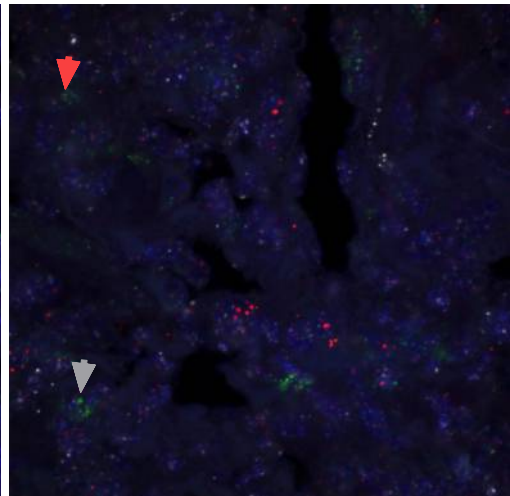

# Supplemental Figure 3

## A

MRI-1867  
(10 mg/kg, PO)  
mouse

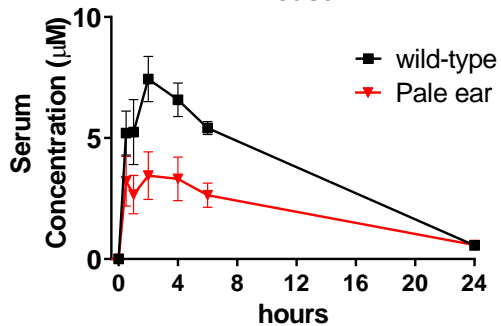

## B

MRI-1867

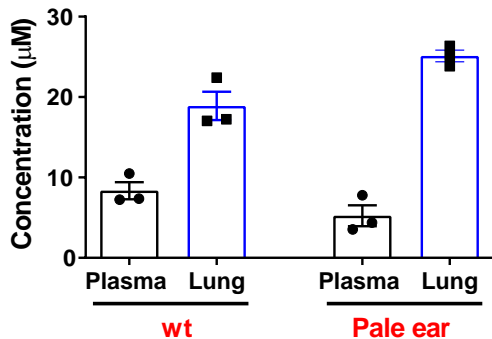

# Supplemental Figure 4

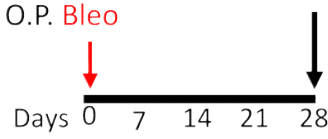

**OP-Bleo**

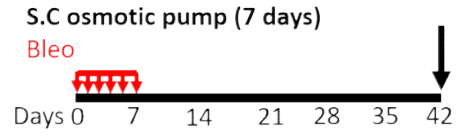

**Sc-Bleo**

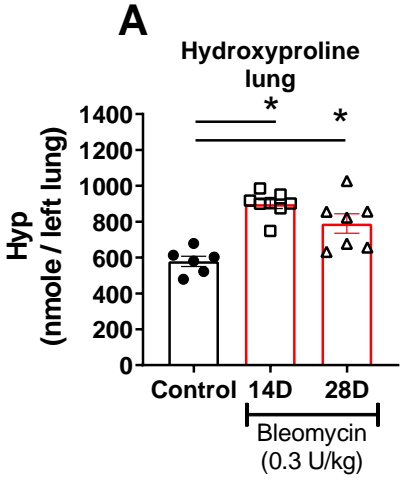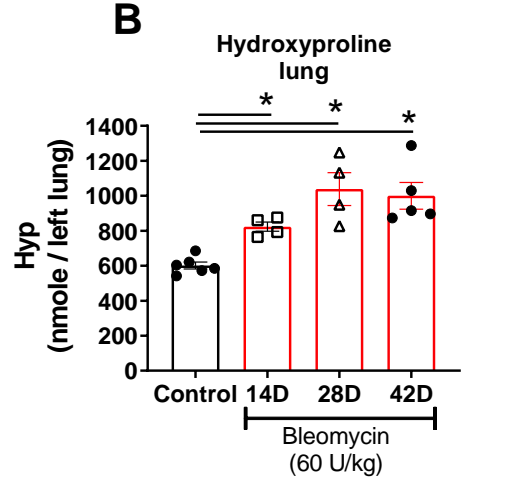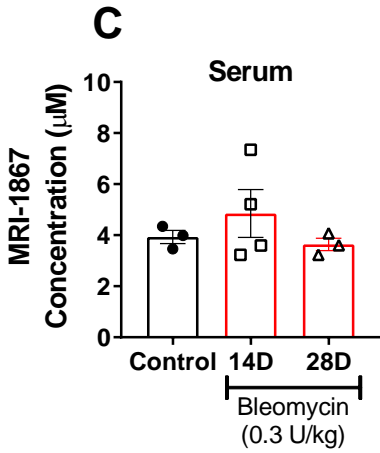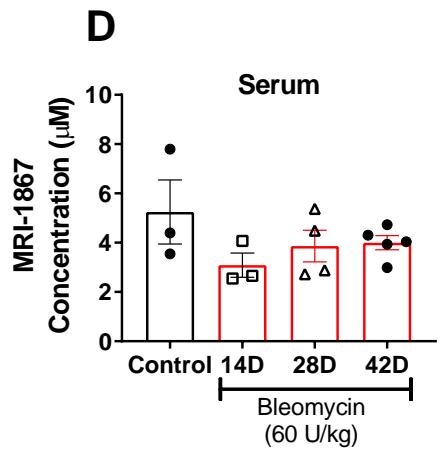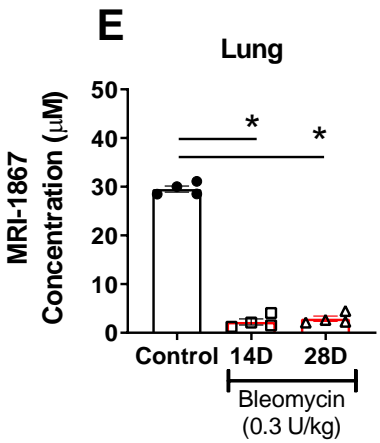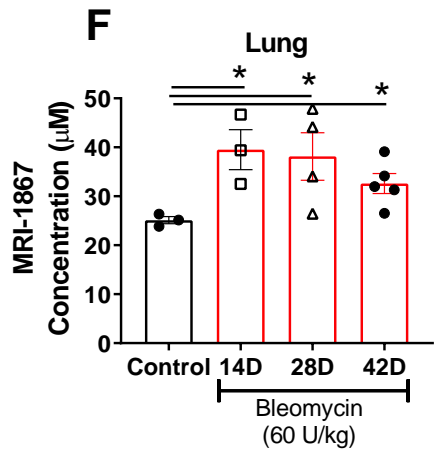

# Supplemental Figure 5

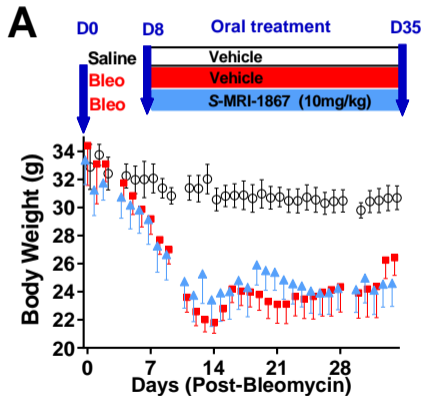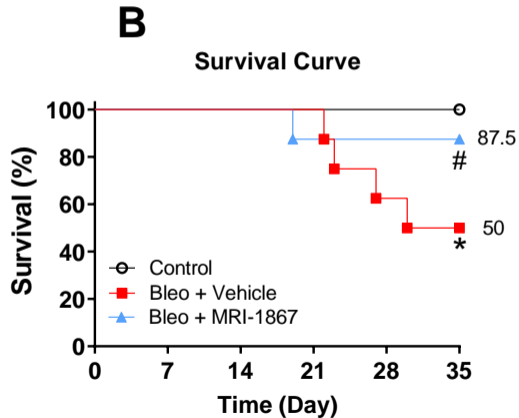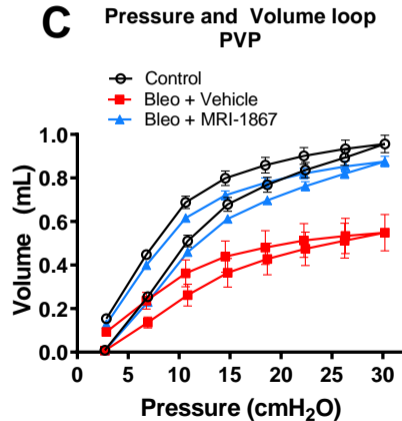

Supplemental Figure 6

Control

Bleomycin

Positive Control

*Cnr1* / *Sftpc*

*Cnr1* / *Sftpc*

*Polr2A* / *Ubc*

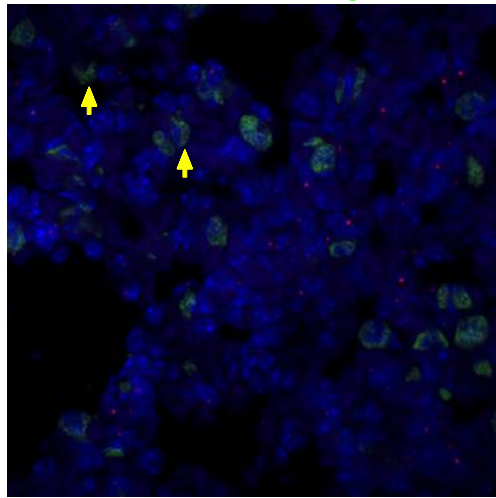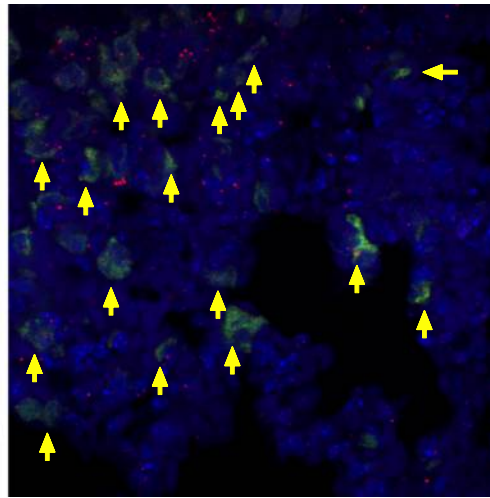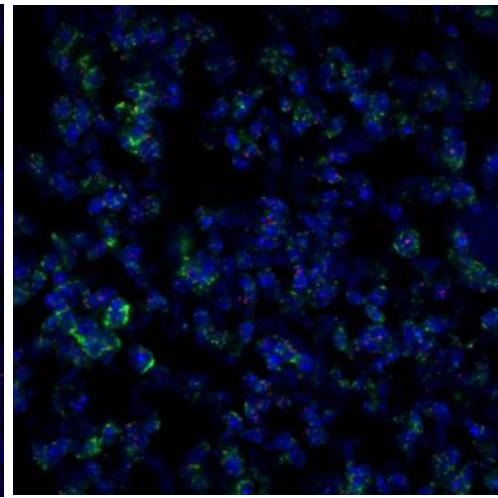

Negative control

*dapB* / *dapB*

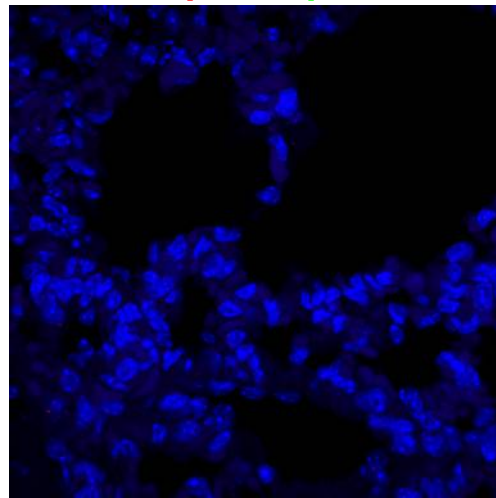

**B**

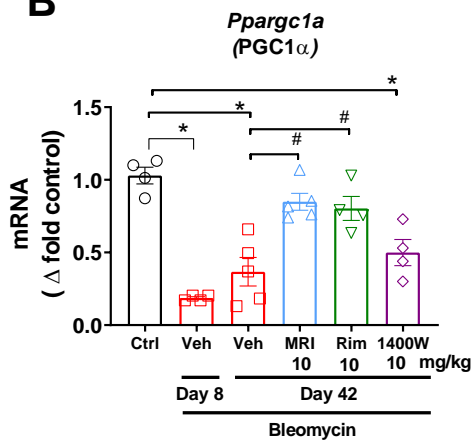

**C**

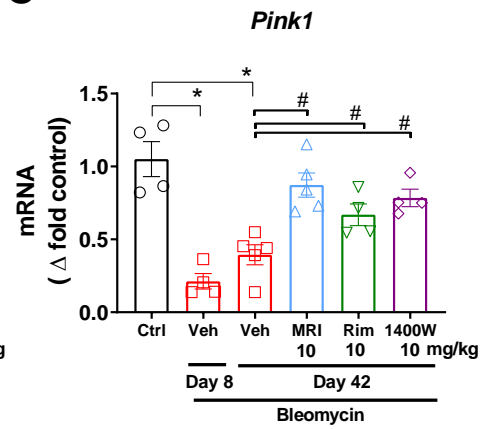

**D**

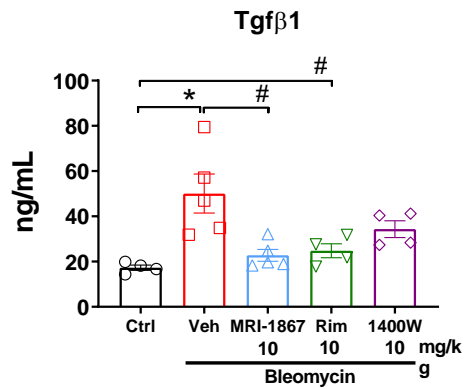

Supplement: CTM2-11-e471-s001.pdf [file CTM2-11-e471-s001.pdf]
